# Supplementary material for: Tuning SEI formation on nanoporous carbon–titania composite sodium ion batteries anodes and performance with subtle processing changes
Source: Royal Society of Chemistry journal article supplement (doi:10.1039/c5ra14907j), 2015-01-01
Supplement: c5ra14907j1.pdf [file c5ra14907j1.pdf]

Electronic Supplementary Information

## Tuning SEI formation on nanoporous carbon-titania composite sodium ion batteries anodes and performance with subtle processing changes

Received 00th January 20xx,  
Accepted 00th January 20xx

DOI: 10.1039/x0xx00000x

Jeongwoo Lee<sup>a</sup>, Yu-Ming Chen<sup>b</sup>, Yu Zhu<sup>b</sup>, and Bryan D. Vogt<sup>a,\*</sup>

www.rsc.org/

<sup>a</sup> Department of Polymer Engineering, University of Akron, Akron, OH 44325.

<sup>b</sup> Department of Polymer Science, University of Akron, Akron, OH 44325.

\* To whom correspondence should be addressed: vogt@uakron.edu

Figure S1 illustrates the morphology of the porous carbon/TiO<sub>2</sub> composite fabricated using 0.35 g PHEMA/0.3 g FA/0.3 g TiO<sub>2</sub> as a function of molecular weight of PHEMA (20K, 300K, and 1000K). The pores of the carbon/TiO<sub>2</sub> composite are significantly larger for the composite produced using 20K PHEMA (Figure S1A) than the carbon/TiO<sub>2</sub> composites from 300K (Figure S1B) and 1000K PHEMA (Figure S1C). The morphology of porous carbon/TiO<sub>2</sub> composites pyrolyzed from PHEMA/FA/TiO<sub>2</sub> appears to be controlled by the mobility of the precursor suspension that decreases as the molecular weight of PHEMA increases. Additionally, agglomeration of the TiO<sub>2</sub> nanoparticles increases as the molecular weight of PHEMA increases.

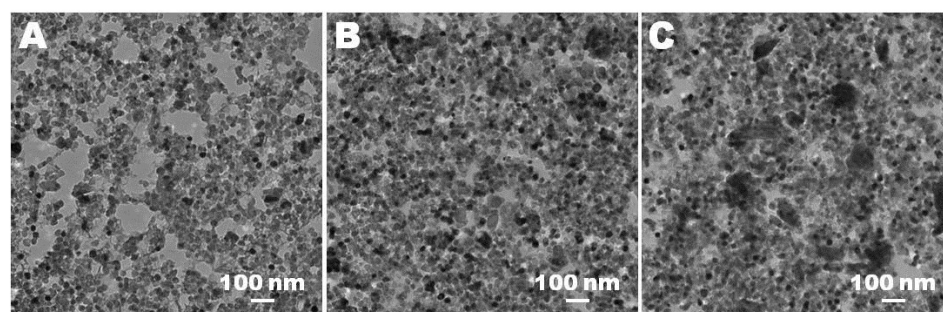

Figure S1. TEM micrographs of porous carbon/TiO<sub>2</sub> composites fabricated with (A) 20K, (B) 300K, and (C) 1000K PHEMA using 0.35 g PHEMA /0.3 g FA/0.3 g TiO<sub>2</sub> for the precursor.

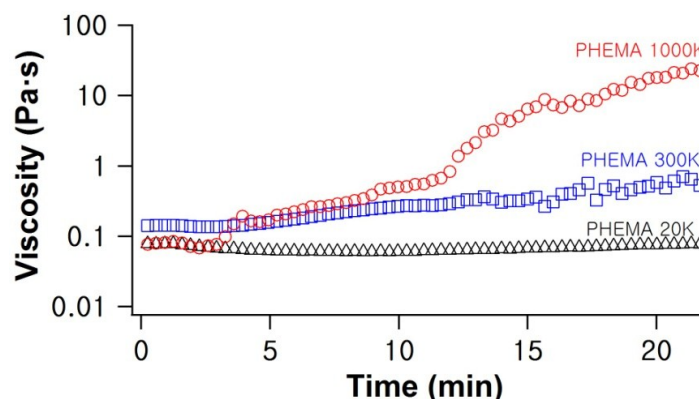

Figure S2. Viscosity variation of FA/PHEMA solutions with different molecular weight of PHEMA during FA polymerization.

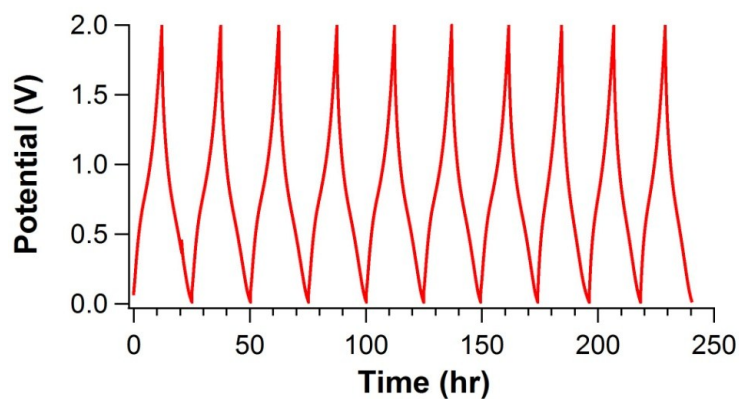

Figure S3. Galvanostatic charge/discharge behavior of carbon/TiO<sub>2</sub> composites from 20K pf PHEMA in a potential range of 0.01–2.0 V at a current density of 10 mA/g.

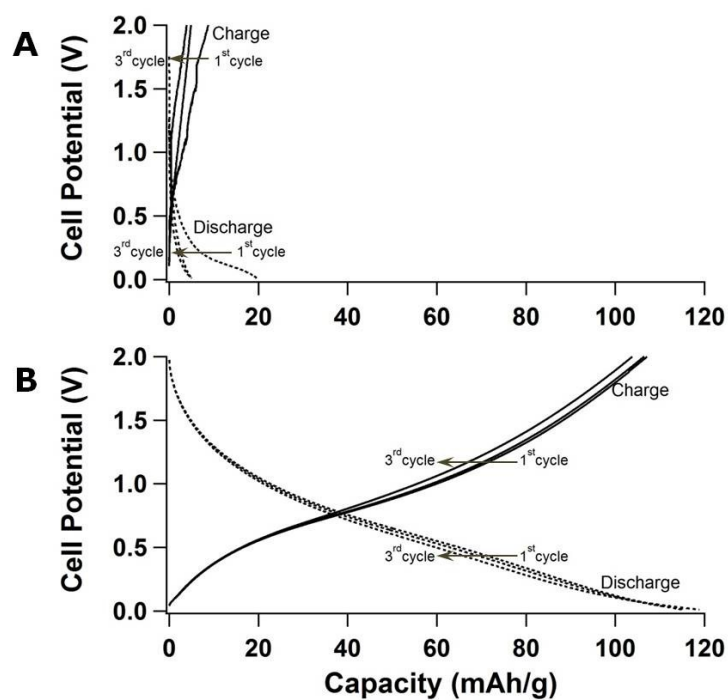

Figure S4. Galvanostatic charge/discharge behavior of (A) TiO<sub>2</sub> and (B) carbon/TiO<sub>2</sub> composites from 20K of PHEMA and 0.3 g of FA in a potential range of 0.01–2.0 V at a current density of 10 mA/g.

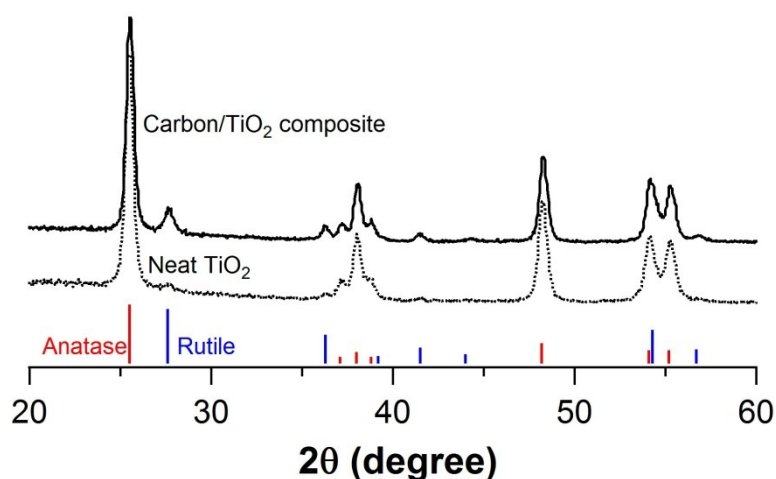

|                                   | Anatase | Rutile |
|-----------------------------------|---------|--------|
| Neat TiO <sub>2</sub>             | 98.3 %  | 1.7 %  |
| Carbon/TiO <sub>2</sub> composite | 89.6 %  | 10.4 % |

Figure S5. XRD profiles for the neat TiO<sub>2</sub> and carbon/TiO<sub>2</sub> composite produced by carbonization of PHBMA/PFA polymer blend with TiO<sub>2</sub> and the standard spectrum of anatase TiO<sub>2</sub> (JCPDS 84–1286, red lines) and rutile TiO<sub>2</sub> (JCPDS 75-1753, blue lines).

The XRD in Figure S5 illustrates that the carbonized composite still contains anatase TiO<sub>2</sub> nanoparticles with strong diffraction peaks at ~26° and ~48°. These peaks are in good agreement with the standard spectrum for anatase (JCPDS no.: 84–1286). Although the content of rutile TiO<sub>2</sub> increases from 1.7 % to 10.4 % after carbonization of PFA/PHBMA/TiO<sub>2</sub> composite, over 91 % of anatase-TiO<sub>2</sub> remains without transformation. The Rutile TiO<sub>2</sub> has strong diffraction peaks at ~28°, ~36° and ~54° (JCPDS no.: 76-1940).

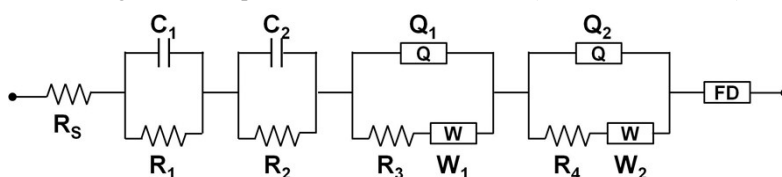

|             | $R_s$ ( $\Omega$ ) | $R_1$ ( $\Omega$ ) | $R_2$ ( $\Omega$ ) | $R_3$ ( $\Omega$ ) | $R_4$ ( $\Omega$ ) | $C_1$ (F)                      | $C_2$ (F)                      | $Q_1$ ( $S \cdot s^n$ )         | $Q_2$ ( $S \cdot s^n$ )        | $W_1$ ( $S \cdot s^{1/2}$ )    | $W_2$ ( $S \cdot s^{1/2}$ )     |
|-------------|--------------------|--------------------|--------------------|--------------------|--------------------|--------------------------------|--------------------------------|---------------------------------|--------------------------------|--------------------------------|---------------------------------|
| PHBMA 20K   | $3 \pm 0.5$        | $174 \pm 44$       | $266 \pm 40$       | $86 \pm 5$         | $21 \pm 3$         | $(1.8 \pm 1.8) \times 10^{-1}$ | $(9.4 \pm 2.4) \times 10^{-6}$ | $(3.0 \pm 2.9) \times 10^{-4}$  | $(2.1 \pm 2.1) \times 10^{-3}$ | $(3.8 \pm 0.5) \times 10^{-2}$ | $(2.1 \pm 2.1) \times 10^{-4}$  |
| PHBMA 300K  | $15 \pm 0.2$       | $339 \pm 9$        | $439 \pm 16$       | $465 \pm 8$        | $12 \pm 3$         | $(3.2 \pm 0.3) \times 10^{-5}$ | $(8.8 \pm 0.4) \times 10^{-6}$ | $(2.7 \pm 0.1) \times 10^{-4}$  | $(1.8 \pm 0.1) \times 10^{-2}$ | $(2.6 \pm 0.8) \times 10^5$    | $(2.7 \pm 1.7) \times 10^{-12}$ |
| PHBMA 1000K | $17 \pm 7$         | $336 \pm 50$       | $202 \pm 30$       | $394 \pm 105$      | $61 \pm 27$        | $(2.7 \pm 1.3) \times 10^{-5}$ | $(3.2 \pm 3.2) \times 10^{-6}$ | $(2.9 \pm 2.0) \times 10^{-3}$  | $(1.9 \pm 0.9) \times 10^{-4}$ | $(2.9 \pm 0.8) \times 10^{-2}$ | $(5.0 \pm 3.8) \times 10^4$     |
| FA 0.2 g    | $10 \pm 6$         | $190 \pm 49$       | $229 \pm 30$       | $0.1 \pm 0.01$     | $21 \pm 9$         | $(6.4 \pm 0.6) \times 10^{-4}$ | $(2.8 \pm 1.2) \times 10^{-5}$ | $(5.2 \pm 4.0) \times 10^{-12}$ | $(3.0 \pm 2.0) \times 10^{-3}$ | $(1.8 \pm 0.2) \times 10^{-2}$ | $(3.3 \pm 3.1) \times 10^{-2}$  |
| FA 0.3 g    | $3 \pm 0.5$        | $174 \pm 44$       | $266 \pm 40$       | $86 \pm 5$         | $21 \pm 3$         | $(1.8 \pm 1.8) \times 10^{-1}$ | $(9.4 \pm 2.4) \times 10^{-6}$ | $(3.0 \pm 2.9) \times 10^{-4}$  | $(2.1 \pm 2.1) \times 10^{-3}$ | $(3.8 \pm 0.5) \times 10^{-2}$ | $(2.1 \pm 2.1) \times 10^{-4}$  |
| FA 0.5 g    | $10 \pm 0.2$       | $180 \pm 3$        | $205 \pm 7$        | $134 \pm 7$        | $573 \pm 16$       | $(2.4 \pm 0.3) \times 10^{-5}$ | $(7.5 \pm 0.3) \times 10^{-6}$ | $(3.9 \pm 0.4) \times 10^{-4}$  | $(4.6 \pm 0.3) \times 10^{-3}$ | $(2.3 \pm 0.2) \times 10^{-2}$ | $(9.8 \pm 1.5) \times 10^4$     |
| FA 0.7 g    | $9 \pm 3$          | $190 \pm 20$       | $27 \pm 23$        | $154 \pm 36$       | $2 \pm 0.2$        | $(8.5 \pm 0.4) \times 10^{-6}$ | $(1.5 \pm 0.2) \times 10^{-5}$ | $(4.7 \pm 1.3) \times 10^{-4}$  | $(6.1 \pm 1.0) \times 10^{-3}$ | $(5.4 \pm 4.6) \times 10^4$    | $(2.1 \pm 2.1) \times 10^9$     |

Figure S6. Equivalent circuit to fit the EIS data of porous carbon/TiO<sub>2</sub> composite electrodes and numerical values of the equivalent circuit components obtained for the impedance data.

In Figure S6,  $R_s$  indicates the bulk resistance of electrolyte, separator, and electrode. These composite anode electrodes consist of carbon and TiO<sub>2</sub> particles. Therefore, it leads to two different SEIs ( $C_1/R_1$  and  $C_2/R_2$ ) on carbon and TiO<sub>2</sub> surfaces. The interfacial charge transfer, Na ion diffusion impedance, and double layer capacitance for carbon and TiO<sub>2</sub> are also considered individually, and thus they are presented by a combination of  $Q_1/(R_3-W_1)$  and  $Q_2/(R_4-W_2)$  circuits in series. FD is the finite length diffusion impedance.

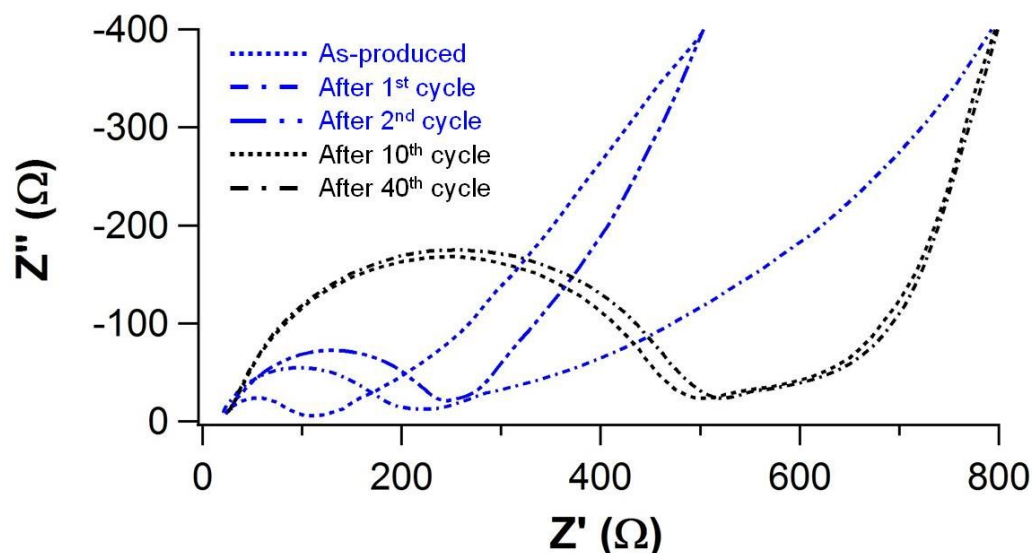

Figure S7. Nyquist plot from EIS data associated with cycling of carbon/TiO<sub>2</sub> composites from 20K of PHEMA and 0.3 g of FA. The impedance changes significantly in the first 10 charge-discharge cycles.

Cyclic voltammetry was carried out by cycling a carbon/TiO<sub>2</sub> composite from 20K of PHEMA for 40 cycles between 0.01 and 2.0 V at a scan rate of 0.01 mV/s. Figure S8 shows the corresponding CV response, with oxidation currents shown as positive and reduction currents shown as negative.

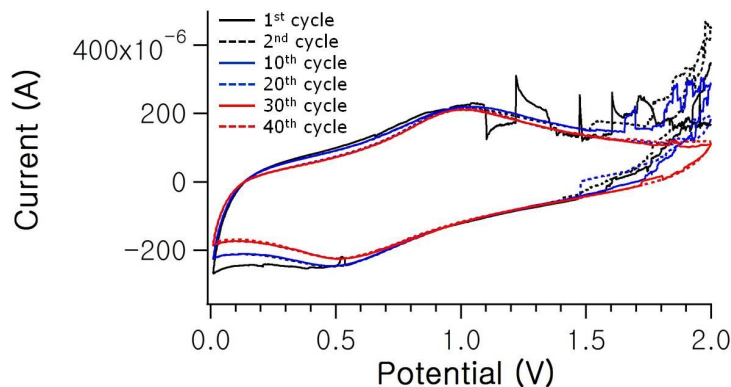

Figure S8. Cyclic voltammetry of the carbon/TiO<sub>2</sub> composite from 20K of PHEMA and 0.3 g of FA at a scan rate of 0.01 mV/s with sodium metal as both counter and reference electrodes.

The distribution of pore size of carbon/TiO<sub>2</sub> composites is shown in Figure S9. The small size pores (<6 nm) are more formed in carbon/TiO<sub>2</sub> composites with increasing the molecular weight of PHEMA in the precursor from 20 kg/mol to 1000 kg/mol. This indicates that the morphology of porous carbon/TiO<sub>2</sub> composites pyrolyzed from PHEMA/FA/TiO<sub>2</sub> can be controlled by the molecular weight of PHEMA used as a thermal decomposition matrix.

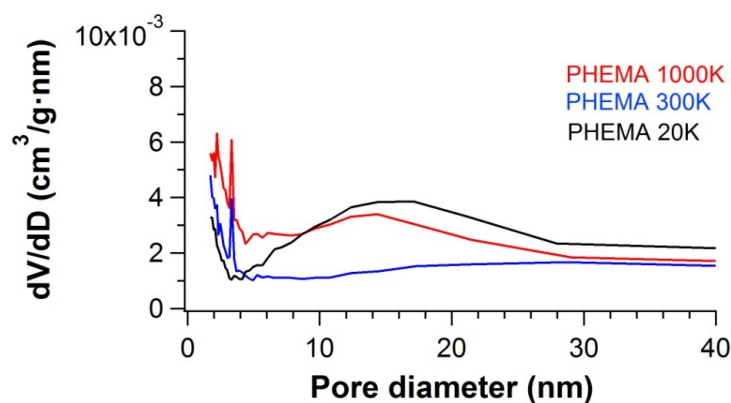

Figure S9. Pore size distribution of carbon/TiO<sub>2</sub> composites fabricated with 20K, 300K, and 1000K PHEMA using 0.35 g PHEMA/0.3 g FA/0.3 g TiO<sub>2</sub> for the precursor.

Figure S10 shows the XPS spectra of the neat and 40 charge-discharge cycled carbon/TiO<sub>2</sub> composite anodes fabricated with 20K, 300K, and 1000K PHEMA using 0.35 g PHEMA/0.3 g FA/0.3g TiO<sub>2</sub> for the precursor. All the cycled samples show that the Na 1s peak appears and the intensity of O 1s peak increase compared to the neat anodes. It indicates that the sodium- included inorganic compounds and oxygen-rich substances form on the surface of anodes as the SEI layer.

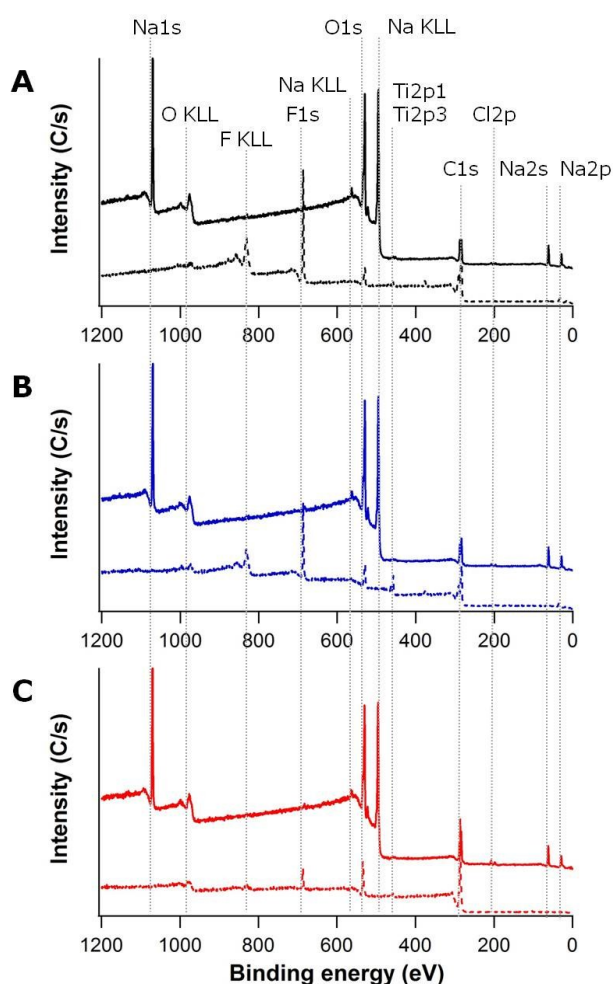

Figure S10. XPS spectra of neat (dash line) and 40 charge-discharge cycled (solid line) carbon/TiO<sub>2</sub> composite anodes fabricated with (A) 20K, (B) 300K, and (C) 1000K PHEMA using 0.35 g PHEMA/0.3 g FA/0.3g TiO<sub>2</sub> for the precursor.



Figure S11 illustrates the morphology of the porous carbon/TiO<sub>2</sub> composite fabricated using 0.35 g PHEMA (20K)/FA/0.3 g TiO<sub>2</sub> as a function of molecular weight of FA (0.2, 0.3, 0.5 and 0.7 g). The pores of the carbon/TiO<sub>2</sub> composite are significantly larger for the composite produced using 0.3 g (Figure S11B) than the carbon/TiO<sub>2</sub> composites from 0.5 g (Figure S11C) and 0.7 g FA (Figure S11D). Figure S11A illustrates the carbon/TiO<sub>2</sub> composite fabricated with 0.2 g FA, which has larger apertures and exposes more TiO<sub>2</sub> particles than other composites because it has small carbon content.

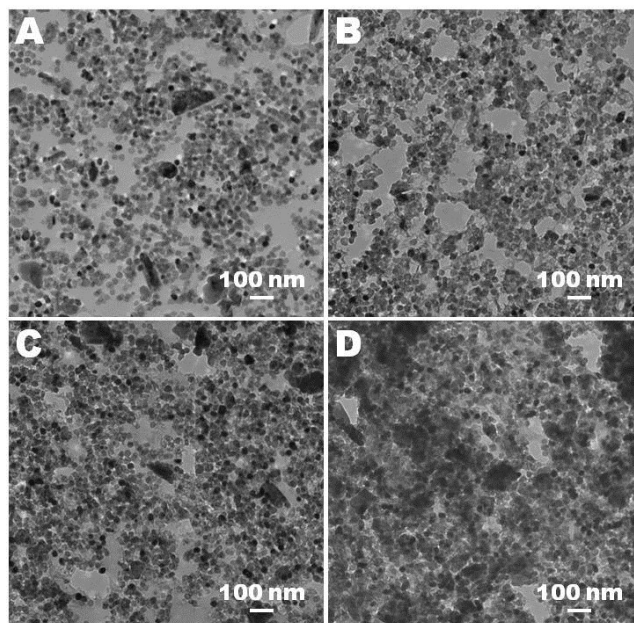

Figure S11. TEM micrographs of porous carbon/TiO<sub>2</sub> composites fabricated with 0.35 g PHEMA (20K)/0.3 g TiO<sub>2</sub>/FA of (A) 0.2, (B) 0.3, (C) 0.5, and (D) 0.7 g for the precursor.

The TGA under air atmosphere is hired to confirm the carbon content of the porous carbon/TiO<sub>2</sub> composite fabricated using 0.35 g PHEMA (20K)/FA/0.3 g TiO<sub>2</sub> as a function of amount of FA (0.2, 0.3, 0.5 and 0.7 g). The TGA curves are shown in Figure S12, and the values are 12, 15, 16, and 18 wt% for the composites using 0.2, 0.3, 0.5, and 0.7 g FA, respectively.

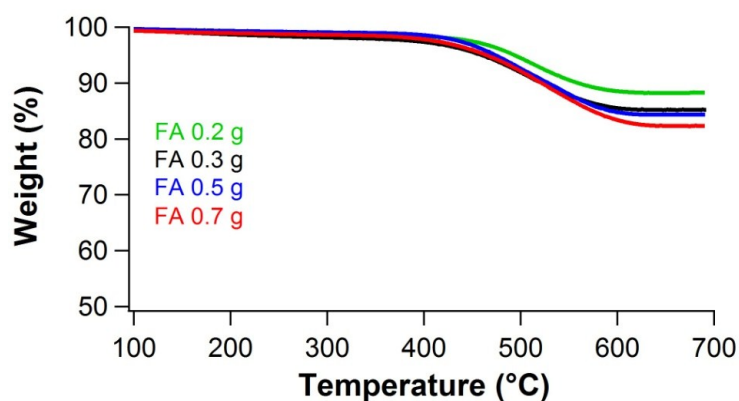

Figure S12. TGA curves of carbon/TiO<sub>2</sub> composites with different amount of FA to determine the carbon content by oxidation in air.

The distribution of pore size of carbon/TiO<sub>2</sub> composites is shown in Figure S13. The small size pores (<6 nm) are more formed in carbon/TiO<sub>2</sub> composites with increasing the amount of FA in the precursor from 0.3 g to 0.7 g. The carbon/TiO<sub>2</sub> composite fabricated with 0.2 g FA has the largest apertures, but also exposes a significant fraction of the TiO<sub>2</sub> nanoparticles. This indicates that the morphology of porous carbon/TiO<sub>2</sub> composites pyrolyzed from PHEMA/FA/TiO<sub>2</sub> can be controlled by the amount of FA used in the synthesis.

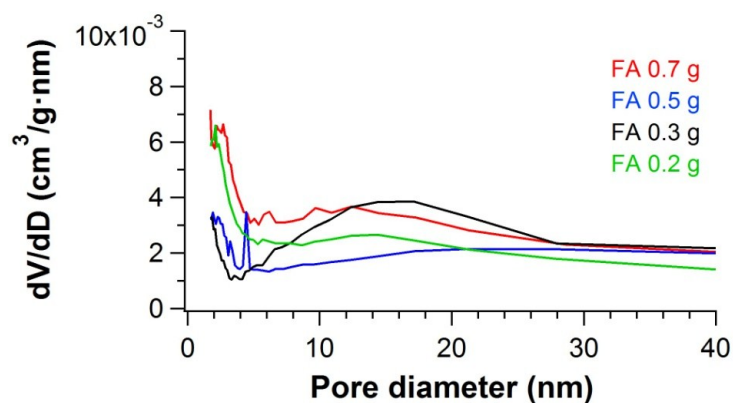

Figure S13. Pore size distribution of carbon/TiO<sub>2</sub> composites fabricated with 0.35 g PHEMA (20K)/0.3 g TiO<sub>2</sub>/different amount of FA for the precursor.

Figure S14 shows the XPS spectra of the neat and 30 charge-discharge cycled carbon/TiO<sub>2</sub> composite anodes fabricated with different carbon contents. It indicates that the sodium- included inorganic compounds and oxygen-rich substances form on the surface of anodes as the SEI layer.

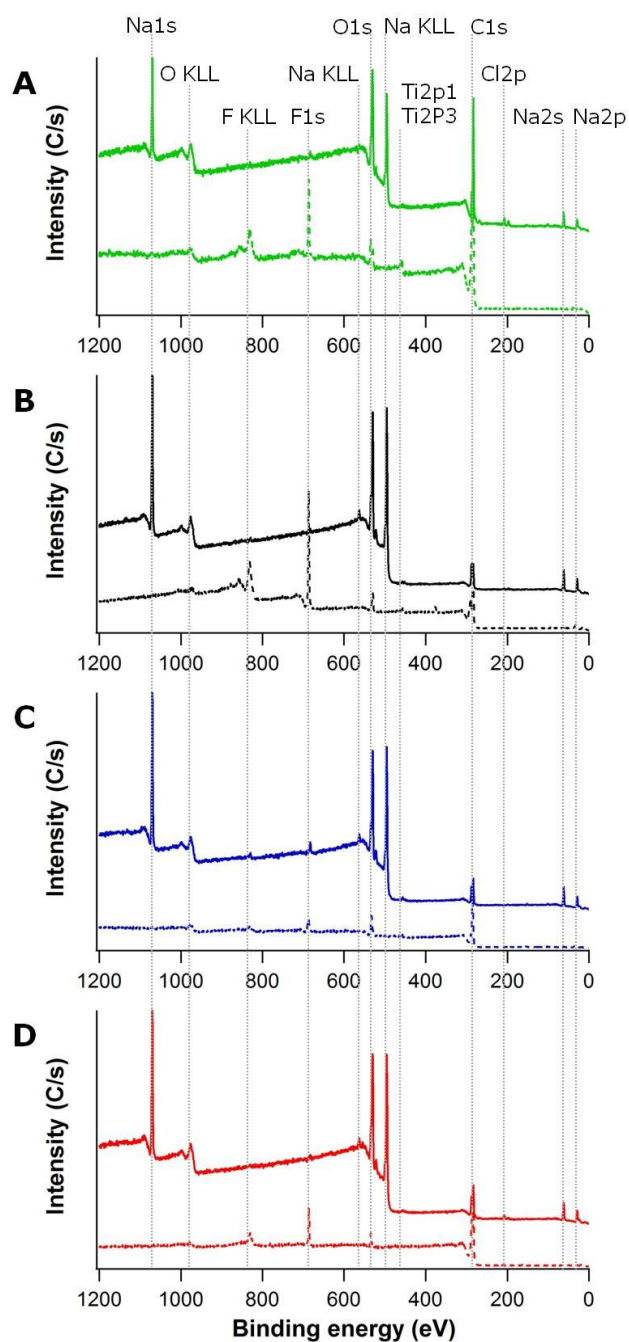

Figure S14. XPS spectra of the neat (dash line) and 30 charge-discharge cycled (solid line) composite anodes fabricated with different carbon contents of carbon/TiO<sub>2</sub> composite: (A) 12 wt%, (B) 15 wt%, (C) 16 wt%, and (D) 18 wt%.
